# Supplementary material
Source: PubMed Central journal article supplement (PMC8436384)
Supplement: hvab148_Supplementary_Data.pdf [file hvab148_Supplementary_Data.pdf]

**Supplemental Table 1.** The kinetics and diagnostic sensitivity of serum N-Ag by days from symptom onset.

| From Symptom onset | Samples (n) | Median (pg/mL) | IQR 25–75% (pg/mL) | TP (n) | FN (n) | Sensitivity (%) |
|--------------------|-------------|----------------|--------------------|--------|--------|-----------------|
| NA*                | 26          | 1              | 1-167              | 11     | 15     | 42.3            |
| Day 1              | 22          | 18             | 1-211              | 15     | 7      | 68.2            |
| Day 2              | 22          | 116            | 30-2015            | 19     | 3      | 86.4            |
| Day 3              | 25          | 1038           | 59-3115            | 24     | 1      | 96.0            |
| Day 4              | 22          | 3520           | 1228-6741          | 21     | 1      | 95.5            |
| Day 5              | 17          | 1905           | 27-7091            | 17     | 0      | 100.0           |
| Day 6              | 8           | 5102           | 1875-10707         | 8      | 0      | 100.0           |
| Day 7              | 27          | 1731           | 680-9881           | 26     | 1      | 96.3            |
| Day 8-14           | 27          | 437            | 31-3416            | 23     | 4      | 85.2            |
| Day 15-21          | 7           | 144            | 1-13694            | 4      | 3      | 57.1            |

n, case number; IQR, interquartile range; TP, True positive; FN, false negative.

\* NA indicates the information of day from symptom onset was not available since cases were asymptomatic at the time of sample collection.

## Supplemental Fig. 1. Cross-sectional studies

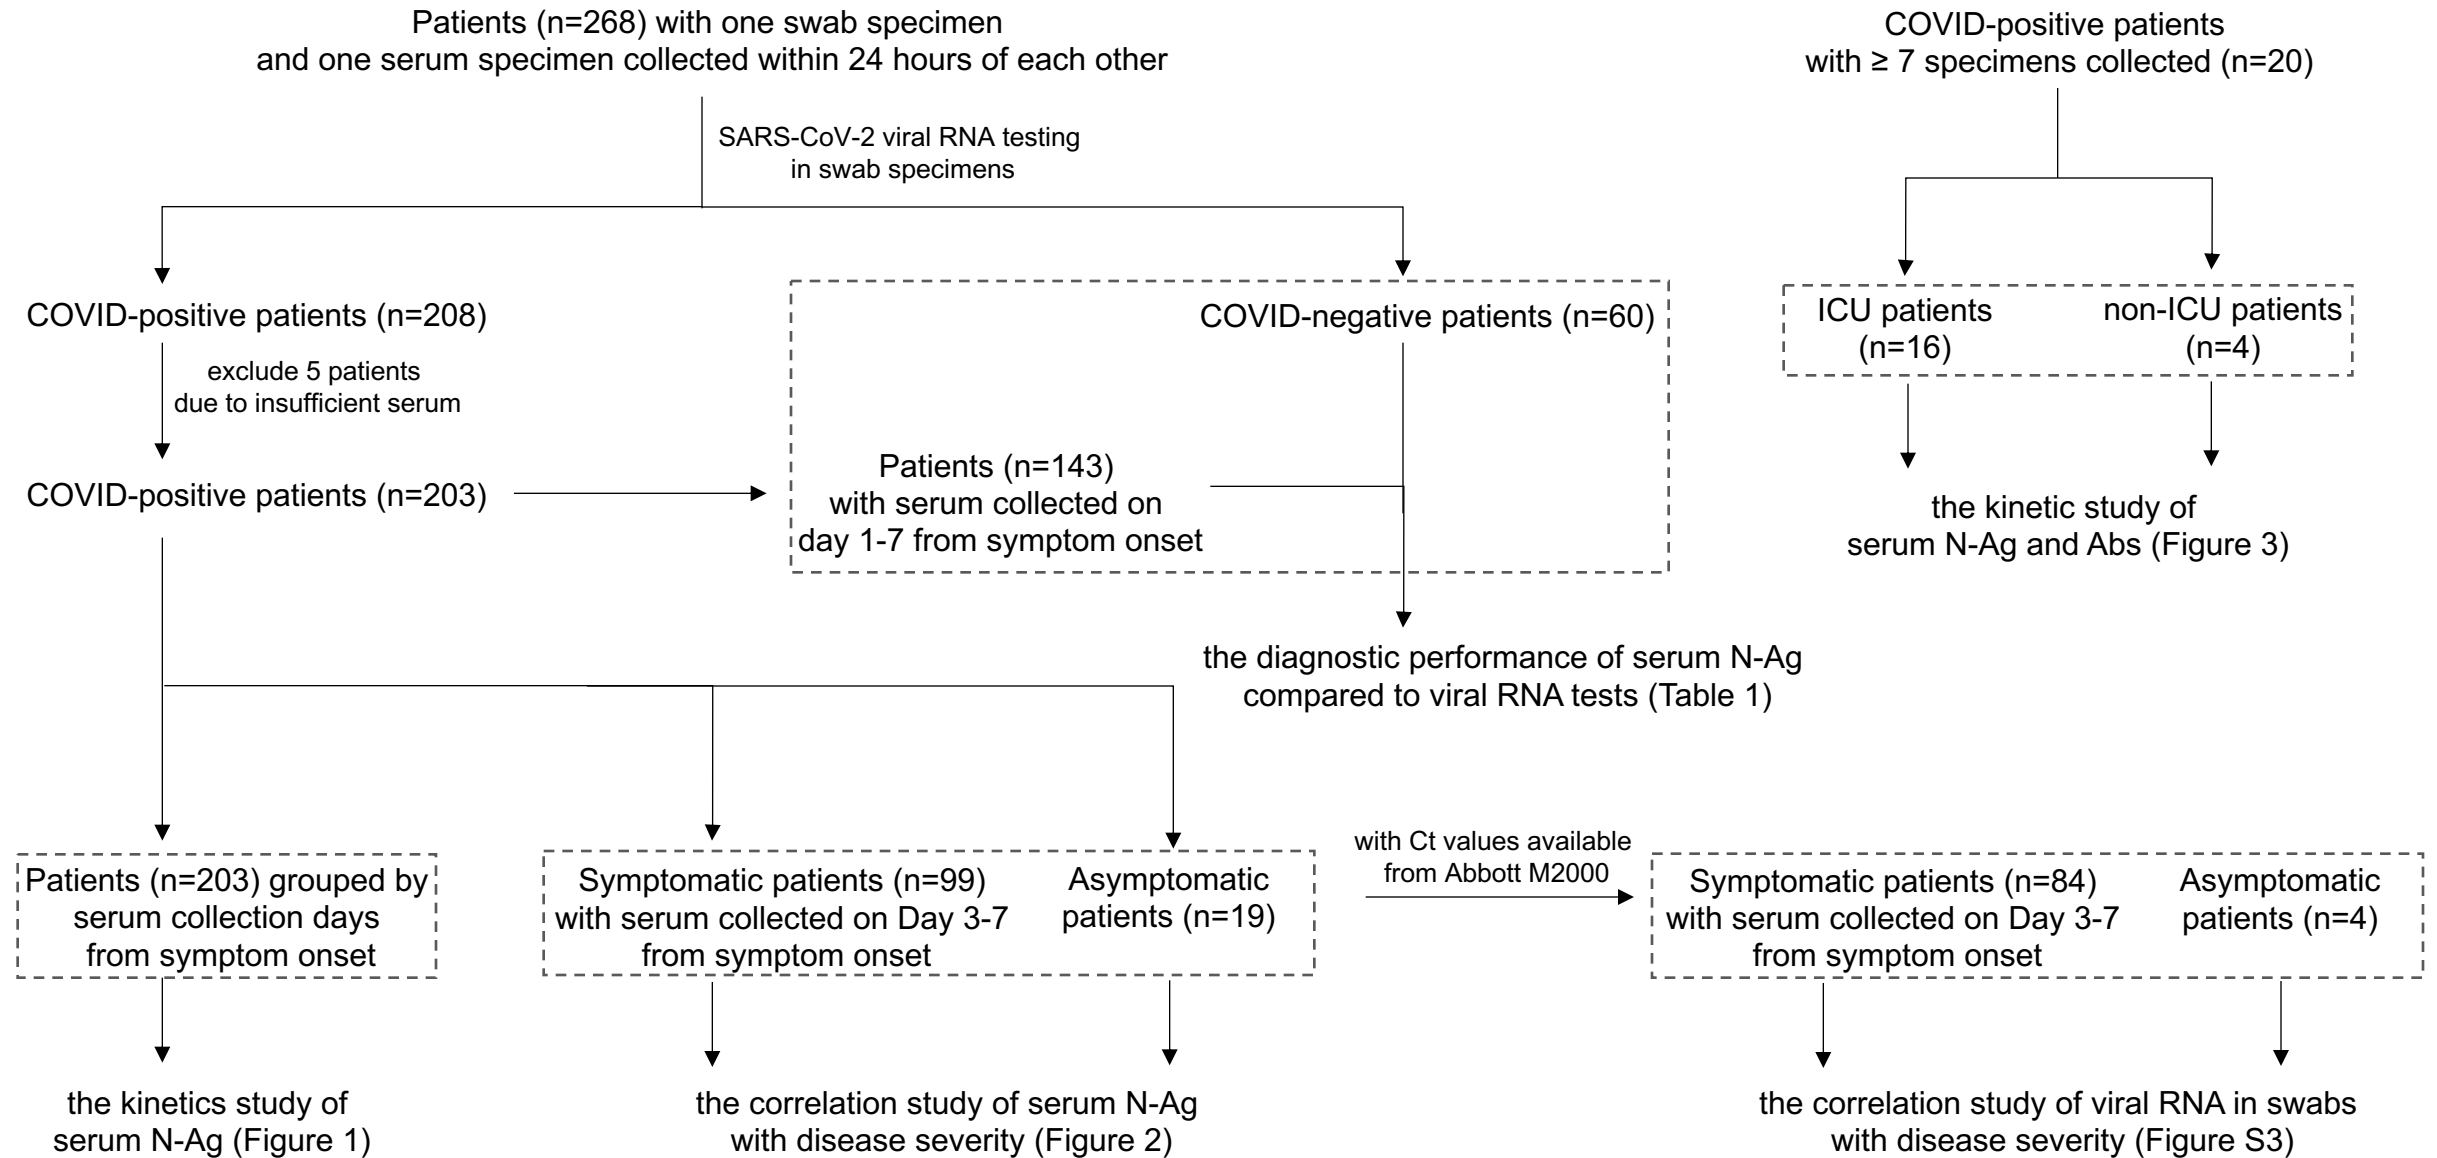

**Supplemental Fig. 1. A,** flowchart diagram of patient and specimen inclusion criteria for cross-sectional and longitudinal studies. The dotted squares indicate cases pooled for different studies.

# Supplemental Fig. 2.

Zhang et al.

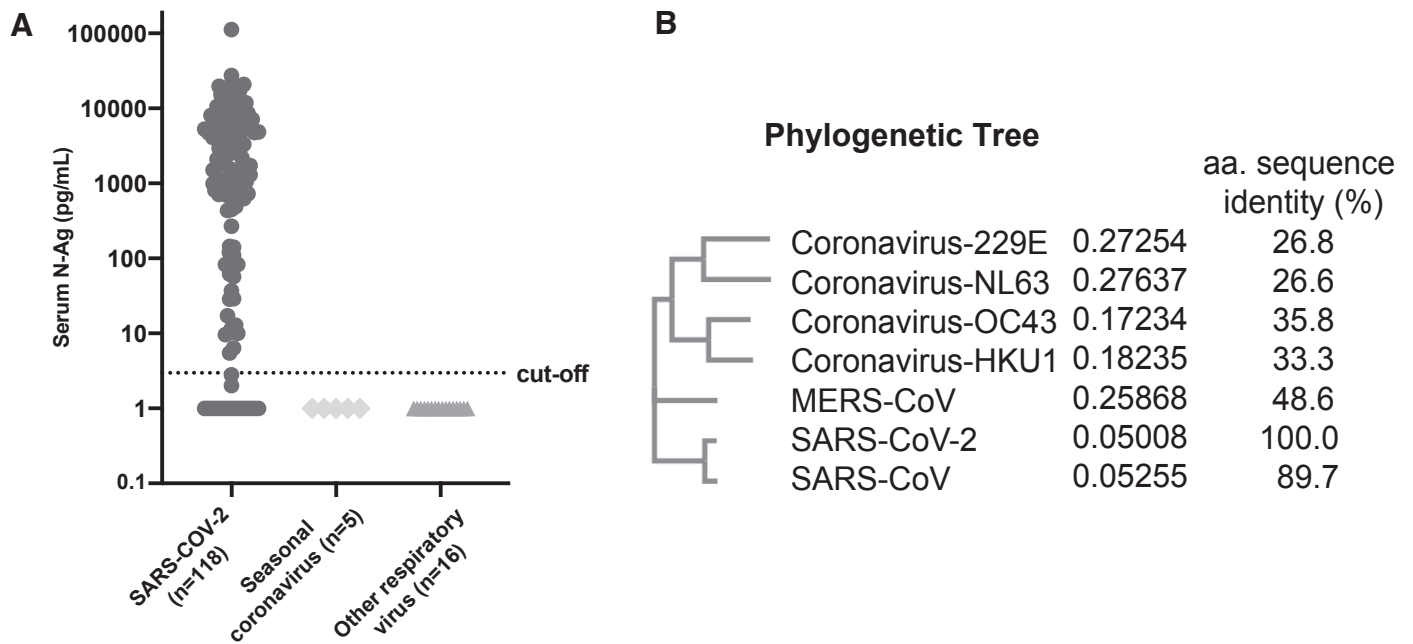

**Supplemental Fig. 2. A**, Serum N-Ag concentrations observed in cases infected with SARS-CoV-2 (N=118), seasonal coronavirus (N=5), and other respiratory virus (N=16). SARS-CoV-2 cases include 99 symptomatic cases on day 3-7 from symptom onset and 19 asymptomatic cases. Seasonal coronavirus includes 229E, OC43, and HKU1; other respiratory virus includes human rhinovirus /enterovirus, metapneumovirus, respiratory syncytial virus, parainfluenza type 1 virus, and adenovirus. Any Ag concentration under 1 pg/mL, lower than limit of blank (1.08 pg/mL), was transferred to 1pg/ml for the data representation on the log-scale. **B**, The amino acid (aa.) sequence similarity of N proteins within the coronavirus family.

**Consensus**

- 1. SARS-CoV-2\_N protein
- 2. SARS-CoV\_N protein
- 3. MERS\_N protein
- 4. 229E\_N protein
- 5. OC43\_N protein
- 6. HKU1\_N protein
- 7. NL63\_N protein

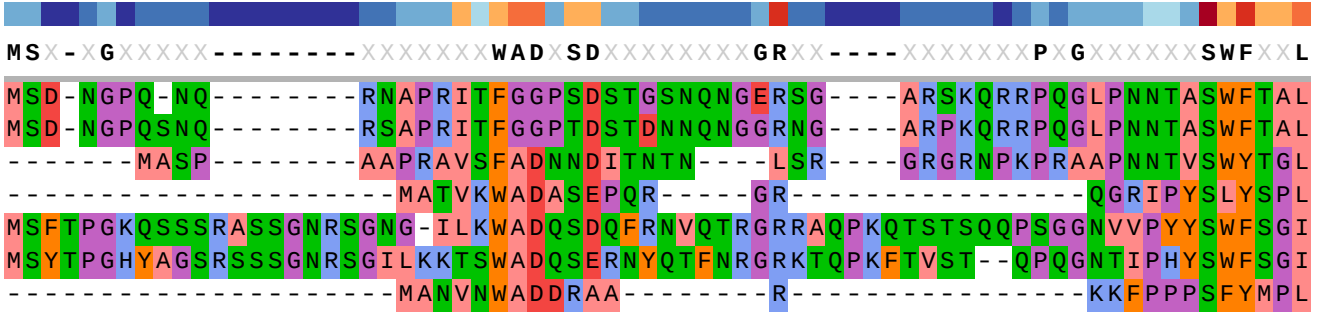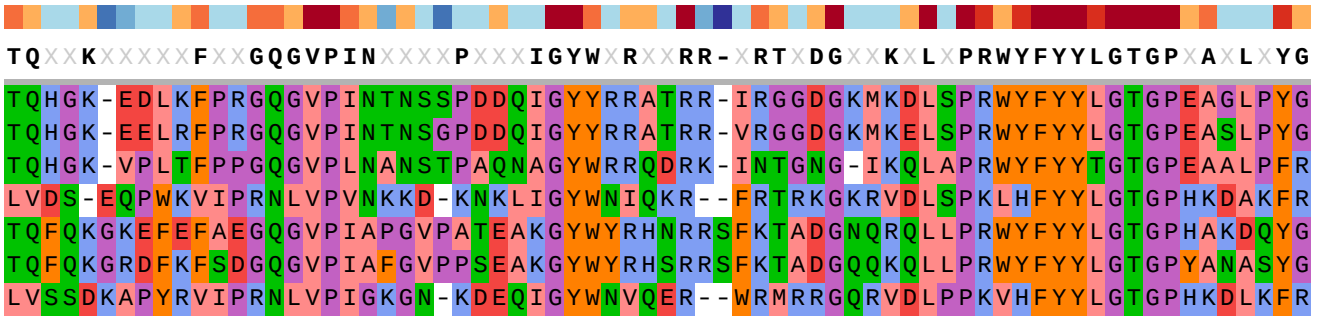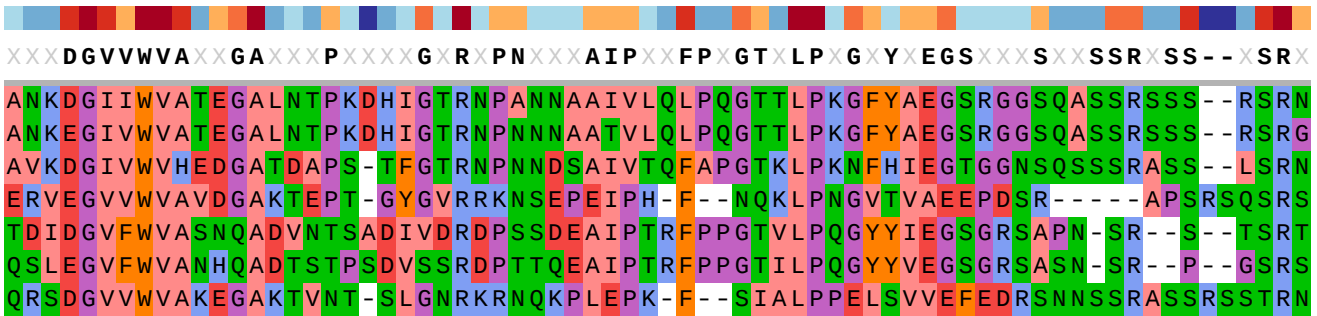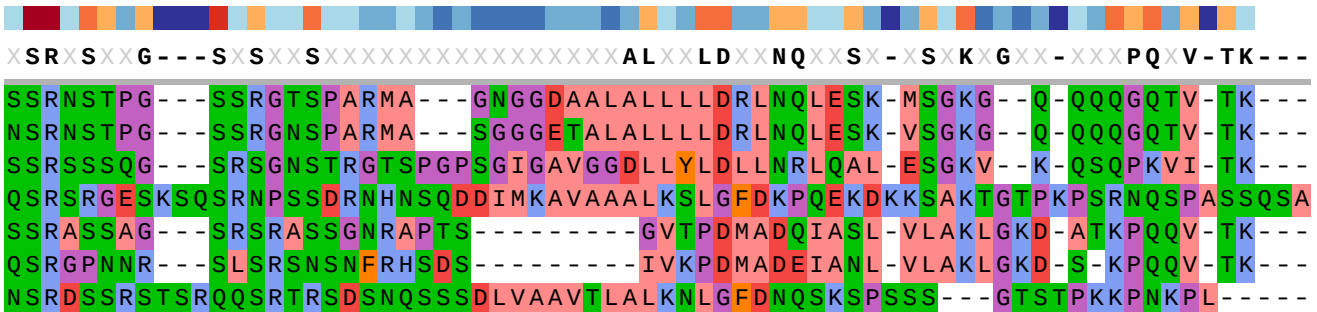

-----XXAXXXXXXXXXXKPRQKRTPTKX--XNVXQCFGXRGPXQ---NFGDXXLXXXGTXXKXXPQX

|   |                                                                         |     |
|---|-------------------------------------------------------------------------|-----|
| 1 | -----KSAA-----EASKKPRQKRATKA--YNTQAFGRRGPEQTQGNFGDQELIRQGTDYKHWPQI      | 304 |
| 2 | -----KSAA-----EASKKPRQKRATKQ--YNTQAFGRRGPEQTQGNFGDQDLIRQGTDYKHWPQI      | 305 |
| 3 | -----KDAA-----AAKNKMRHKRTSTKS--FMVQAFGLRGPGLQGNFGDLQLNKLGTEDPRWPQI      | 296 |
| 4 | AKILARSQSSEETKEQKHEMQKPRWKRQPNDDVTSNVTQCFGPRDLDH---NFGSAGVVANGVKAKGYPQF | 292 |
| 5 | -----HTAKEVRQKILNKPRQKRSPNKQ--CTVQQCFGKRGPNQ---NFGGEMLKLGTSDPQFPIL      | 313 |
| 6 | -----QNAKEIRHKILTKPRQKRTPNKH--CNVQQCFGKRGPSQ---NFGNAEMLKLGTNDPQFPIL     | 311 |
| 7 | -----SQPRADKPSQLKKPRWKRVPTRERE--ENVIQCFGPRDFNH---NMGSDLVQNGVDAKGFPQL    | 277 |

AELAPXAXAFFXSXXXXXXXXX-----XXXXLTYXGAIXXDXXXPXFXXXXXXXXLXXXXDAYXXX

|   |                                                                        |     |
|---|------------------------------------------------------------------------|-----|
| 1 | AQFAPSASAFFGMSRIGMEVTP-----SGTWLTYTGAIKLDKDPNFKDQVILLNKHIDAYKTF        | 363 |
| 2 | AQFAPSASAFFGMSRIGMEVTP-----SGTWLTYHGAIKLDKDPQFKDNVILLNKHIDAYKTF        | 364 |
| 3 | AELAPTASAFMGMSQFKLTHQN-----NDDHGNPVYFLRYSGAIKLDKPNPNYKWLLELEQNIDAYKTF  | 361 |
| 4 | AELVPSTAAMLFDSHIVSKESG-----NTVVLTFTRVTVPKDHPLGKFLLEEL-----NAFTRE       | 347 |
| 5 | AELAPTAGAFFFGSRLELAKVQNLSGNPDEPQKDVYELRYNGAIRFDSTLSGFETIMKVLNENLNAYQQQ | 383 |
| 6 | AELAPTPGAFFFGSKLELVKRE---SEADSPVKDVFELRYSGSIRFDSTLPGFETIMKVLKENLDAYVNS | 378 |
| 7 | AELIPNQAALFFDSEVSTDEVG-----DNVQITYTYKMLVAKDNKNLPKFIEQI-----SAFTKP      | 332 |

XXXX-----X--XXXXXPQRQXXXX-----XXXXXXXXXXXXXXXXXPP-----XXXXXXXXDXXXEXXXLXXXXXXXX

|   |                                                                  |     |
|---|------------------------------------------------------------------|-----|
| 1 | PPTEPKKDKKKKAD--ETQALPQRQ-----KKQQTVTLLP-----AADLDDFSKQLQQSMSS   | 413 |
| 2 | PPTEPKKDKKKKTD--EAQPLPQRQ-----KKQPTVTLLP-----AADMDDFSRQLQNSMSG   | 414 |
| 3 | PKKEKKQKAPKEESTDQMSSEPPKEQRVQGSITQRTTRRPSVQGP-----MIDVNTD-----   | 413 |
| 4 | MQ-----QQPLLNPSELEFNP--SQTSPATVEP--VRDEVSIEDIIDEVN-----          | 389 |
| 5 | DG-----MMNMSPKPQRQRGLK--NGQGENDNISVASPKSRVQQNKSRELTAEDISLLKMDDE  | 439 |
| 6 | NQNT-----VSGSLSPKPRKRGVK--QSPELLDPLNLSA---DTQHISNDFTPEDHSLLATLDD | 433 |
| 7 | SS-----IKEMQSQSSHVVQNTVLNASIPESKP--LADDDSAIIEIVNEVLH-----        | 377 |

XXXXXX--

|   |          |     |
|---|----------|-----|
| 1 | ADSTQA-- | 419 |
| 2 | ASADSTQA | 422 |
| 3 | -----    | 413 |
| 4 | -----    | 389 |
| 5 | PYTEDTSE | 447 |
| 6 | PYVEDSVA | 441 |
| 7 | -----    | 377 |

# Supplemental Fig. 3.

Zhang et al.

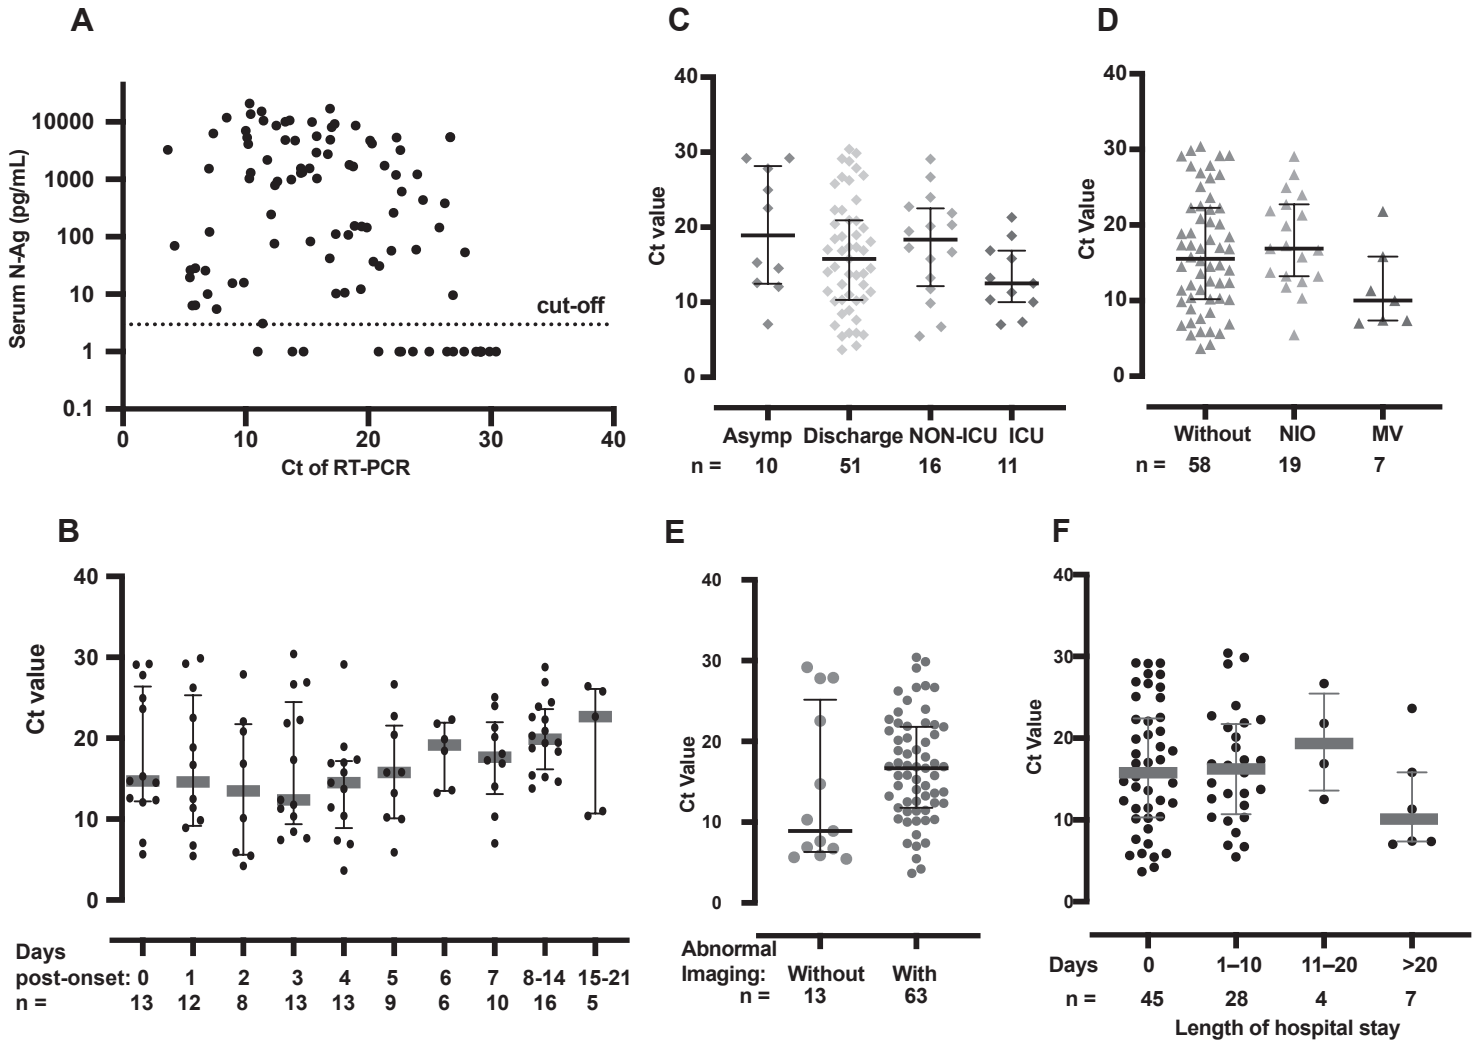

**Supplemental Fig.3.** **A**, No significant correlation between N-Ag concentrations in serum and Ct values of RT-PCR in NP swabs. Each dot indicates one case, for which serum and NP swab samples were collected within 24 hrs. Cut-off was set at 2.97 pg/mL. Any Ag concentration under 1 pg/mL, lower than limit of blank (1.08 pg/mL), was transferred to 1 pg/mL for data representation on the log-scale. **B**, Ct value by days after symptom onset. Each dot indicates Ct value of RT-PCR which evaluated viral RNA in a NP swab sample and were grouped by swab collection days from symptom onset, and each red line indicates the mean value in each time-period group. **C-F**, No significant correlation of Ct Values of RT-PCR with disease severity: **C**, in cases with different highest level of outcomes, including asymptomatic (Asymp), symptomatic but discharged (discharged), hospitalized-to-non-ICU (NON-ICU), and hospitalized-to-ICU (ICU); **D**, in cases without medical interventions, with non-invasive oxygenation (NIO), or with mechanical ventilation (MV); **E**, in cases without or with chest abnormal findings; and **F** in cases with different length of hospital stay, including 0, 1-10, 11-20, and > 20 days. All swab samples were collected during day 0-7 from symptom onset. The case number (n) is indicated under each group.
